# Supplementary material
Source: Springer Nature journal article supplement (https://www.springermedizin.de/resource/supplementary/12913_2011_2401_MOESM2_ESM.pdf/9529778)

**TKR, hospital perspective**

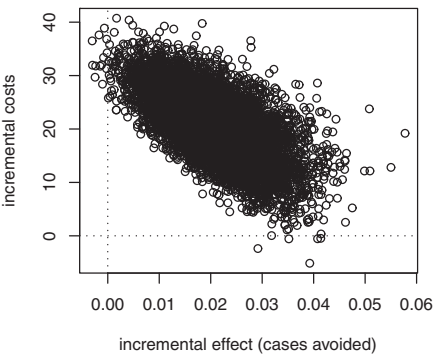

**TKR, SHI perspective**

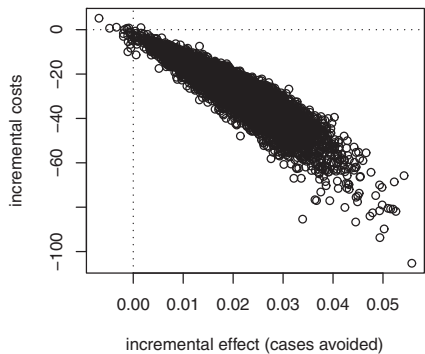

**THR, hospital perspective**

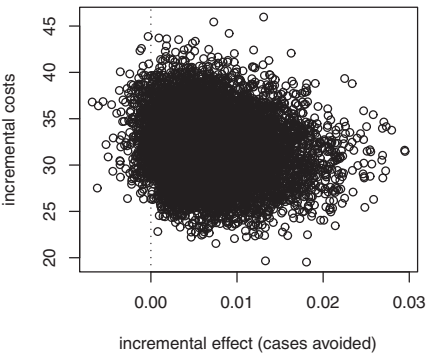

**THR, SHI perspective**

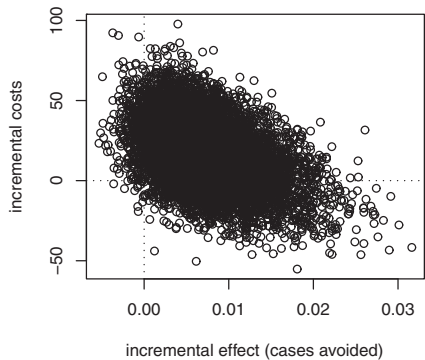

Supplement: MOESM2 [file 9529778]
